# Supplementary material for: Lrig1 expression prospectively identifies stem cells in the ventricular-subventricular zone that are neurogenic throughout adult life
Source: PubMed Central journal article supplement (PMC7077007; doi:10.1186/s13064-020-00139-5), 2020-03-17

**Lrig1 in Id1<sup>high</sup> neural stem cells cultured in vitro**

Adapted from Nam and Benezra, 2009

**A** Id1-VenusYFP fusion protein

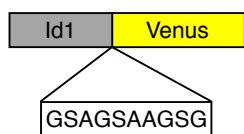

*Id1*<sup>Venus</sup> knock-in allele

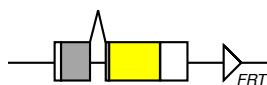

Establish NSPC cultures with unfractionated lateral wall cells of *Id1*<sup>Venus/Venus</sup> mice using FGF-2 and EGF

**B** The Id1-Venus signal in these cells responds to exogenous factors (~24 h after changing)

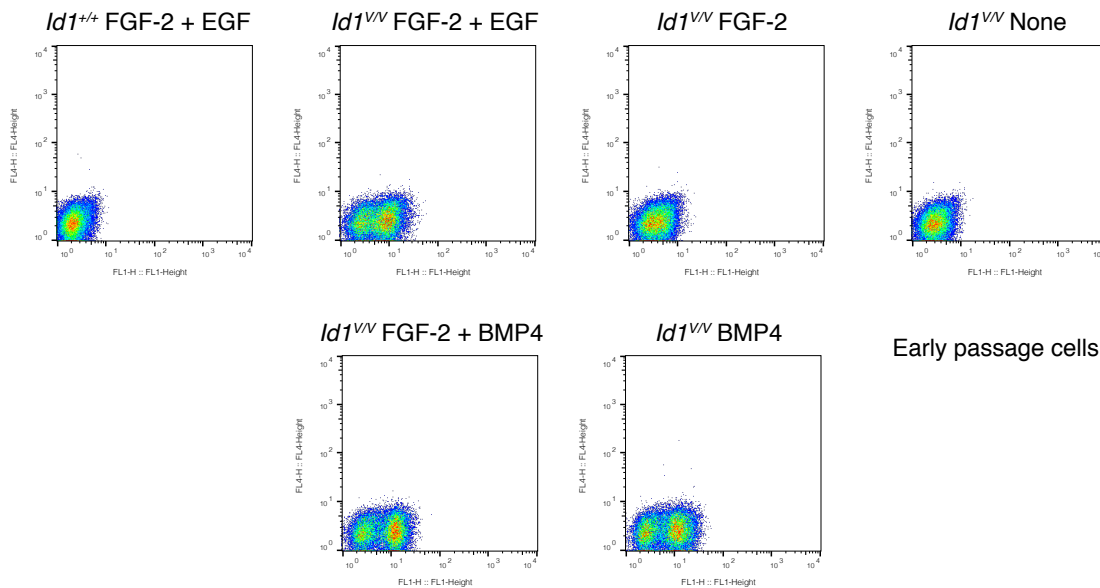

**C** Marker protein expression in cultured *Id1*<sup>VV</sup> NSPC fractions (+FE)

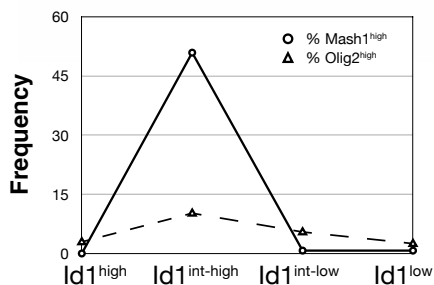

**D** FACS sort of *Id1*<sup>high</sup> fraction (+FE)

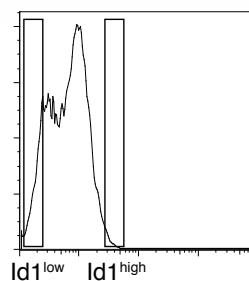

→ Microarray analyses of RNA from *Id1*<sup>high</sup> and *Id1*<sup>low</sup> fractions of *Id1*<sup>VV</sup> NSPC cultured with FGF-2 + EGF  
 → Transcripts >1.5-fold enriched in the *Id1*<sup>high</sup> fraction  
 → Candidate genes for further studies, *Lrig1*, *Cdk6*, *Clu*, etc

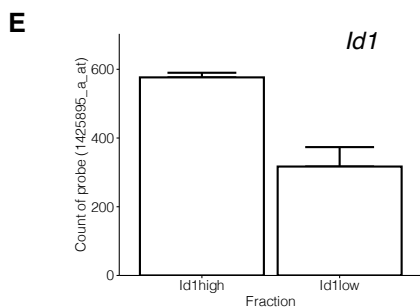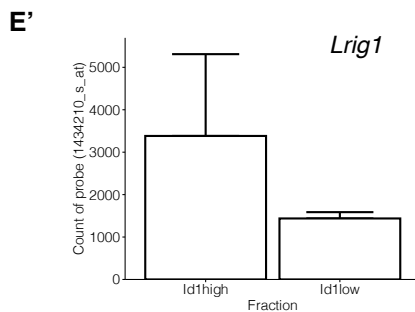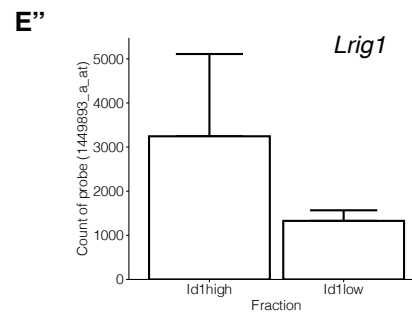

Supplement: 13064_2020_139_MOESM1_ESM.pdf [file 13064_2020_139_MOESM1_ESM.pdf]
